# Supplementary material for: Cyanobacterial photosynthesis under sulfidic conditions: insights from the isolate Leptolyngbya sp. strain hensonii
Source: PubMed Central journal article supplement (PMC5776472; doi:10.1038/ismej.2017.193), 2018-01-12
Supplement: ismej2017193x1.pdf [file ismej2017193x1.pdf]

**Cyanobacterial photosynthesis under sulfidic conditions - Insights from the isolate**

***Leptolyngbya* sp. strain hensonii**

Trinity L. Hamilton, Judith M. Klatt, Dirk de Beer, and Jennifer L. Macalady

**SUPPLEMENTAL MATERIAL**

**CONTENTS**

|        |                                                                                     |    |
|--------|-------------------------------------------------------------------------------------|----|
| 1.     | SUPPLEMENTAL METHODS .....                                                          | 2  |
| 1.1.   | Enrichment and isolation .....                                                      | 2  |
| 1.2.   | Nucleic acid analyses .....                                                         | 2  |
| 1.3.   | Genomic sequencing .....                                                            | 2  |
| 1.4.   | Phylogenetic analysis .....                                                         | 3  |
| 2.     | MODEL FOR THE KINETIC REGULATION OF OXYGENIC AND ANOXYGENIC<br>PHOTOSYNTHESIS ..... | 4  |
| 2.1.   | Oxygenic photosynthetic electron transport reactions.....                           | 4  |
| 2.1.1. | Formulation of Rate laws for oxygenic photosynthesis .....                          | 5  |
| 2.2.   | Anoxygenic electron transport reactions .....                                       | 10 |
| 2.2.1. | Formulations of rate laws for anoxygenic photosynthetic electron transport .....    | 10 |
| 3.     | SUPPLEMENTAL FIGURES .....                                                          | 14 |
| 4.     | SUPPLEMENTAL TABLES .....                                                           | 20 |
| 5.     | SUPPLEMENTAL REFERENCES .....                                                       | 26 |

## **1. SUPPLEMENTAL METHODS**

### **1.1. Enrichment and isolation**

Samples of red pinnacle mat were homogenized and a small aliquot (~ 500  $\mu\text{L}$ ) was added to BG11 media (Rippka et al., 1979) supplemented with 25 mM HEPES (B-HEPES) and adjusted to pH 7.2. Enrichment cultures were maintained in 60-mL of liquid media in 125-mL conical flasks at 100 RPM at 28 °C under either a day-night cycle or continuously illuminated with 100  $\mu\text{mol photons m}^{-2} \text{ s}^{-1}$  under cool white fluorescent lamps. An axenic culture was achieved using a dilution series in liquid media where the highest dilution which showed growth was taken as inoculum for the next dilution. Light microscopy was performed periodically to visually examine enrichments for purity. The dilution to extinction strategy was continued until light microscopy indicated the presence of a single morphotype and sequencing of the 16S rRNA gene returned a single phylotype. Growth of the isolate was monitored with chlorophyll *a* concentration determined spectrophotometrically using the absorption at 665 nm of a methanol extract and an extinction coefficient of 0.075  $\text{ml } \mu\text{g}^{-1}$  (made from a filtered 2-ml culture subsample) (De Marsac and Houmard, 1988) or protein concentration using the Bradford assay (Bradford, 1976) with bovine serum albumin (Sigma-Aldrich, St. Louis, MO) as the standard.

### **1.2. Nucleic acid analyses**

Samples of biofilm (~ 1.5 mL) were harvested by centrifugation, the excess media removed by decanting, and cell pellets frozen immediately (-20 °C) or subjected to nucleic acid extraction. Genomic DNA was extracted as previously described (Boyd et al., 2007). Quality of extracted DNA was assessed on an agarose gel (1%) using the HiLo DNA Marker (Bionexus, Oakland, CA) and visualized by ethidium bromide staining and using a NanoDrop ND-1000 spectrophotometer (NanoDrop Technologies, Wilmington, Delaware). To check for purity/contaminants, 16S small subunit RNA genes were amplified with bacterial domain primers 27F and 1492R were used (Lane, 1991) as described previously (Hamilton et al., submitted). Reactions were performed in triplicate, purified using a QIAquick PCR Purification Kit (Qiagen, Valencia, CA) and sequenced at the Genomics Core Facility of the Huck Institutes of the Life Sciences at Penn State University. Sequences were assembled and manually checked using Bio-Edit (v7.2.5), and checked for chimeras using CHIMERA\_CHECK (Cole et al., 2003). Putative chimeras were excluded from subsequent analyses. A single 16S rRNA gene sequence was recovered indicating the culture was pure.

### **1.3. Genomic sequencing**

Double-stranded gDNA was quantified by Qubit (Life Technologies, Carlsbad, CA) and 100 ngs of DNA was fragmented for 7 minutes at 37 °C using the Ion Shear Reagent according to the Ion Xpress™ Plus gDNA and Amplicon Library Preparation Users Guide (Life Technologies, Carlsbad, CA). Fragments

were purified using AMPure XP Reagent (Beckman Coulter, Brea, CA) and checked for size on a Bioanalyzer DNA High Sensitivity chip (Agilent Technologies, Santa Clara, CA). Adaptors were ligated to the fragments and DNA was nicked, repaired and then purified. A 315 bp library was size-selected on a Pippin (Sage Science, Beverly MA) using the "tight setting". Following purification, the library was checked again on the Bioanalyzer and then amplified on beads in an emulsion PCR using the Ion Xpress Template Kit and 200 base sequencing was performed using a 316 chip on the Ion PGM machine as per the Users Guide (Life Technologies, Carlsbad, CA) at the Genomics Core Facility of the Huck Institutes of the Life Sciences at Penn State University.

#### **1.4. Phylogenetic analysis**

For gene-specific phylogenetic analyses, full-length sequences were identified in the genome using functional annotation and BLASTX, translated, and verified by BLASTP. Reference datasets were populated by detecting homologs in IMG genomic databases by BLASTP (Altschul et al., 1997). Protein sequences were aligned with MUSCLE (Edgar, 2004) and redundancy in the alignments was reduced through the Decrease Redundancy Program ([http://web.expasy.org/decrease\\_redundancy/](http://web.expasy.org/decrease_redundancy/)). Maximum likelihood trees were constructed using PhyML (Guindon et al., 2010) with the LG+gamma model, four gamma rate categories, ten random starting trees, NNI branch swapping, and substitution parameters estimated from the data. The resulting trees were viewed and edited using iTOL (<http://itol.embl.de/>) (Letunic and Bork, 2016).

## 2. MODEL FOR THE KINETIC REGULATION OF OXYGENIC AND ANOXYGENIC PHOTOSYNTHESIS

*Leptolyngbya* sp. strain *hensonii* shows a complex response to H<sub>2</sub>S: (I) rates of anoxygenic photosynthesis (AP) are regulated by both H<sub>2</sub>S and irradiance (Fig. 5); (II) O<sub>2</sub> production is entirely inhibited by minute H<sub>2</sub>S concentrations (Fig. 4); (III) the recovery rate of oxygenic photosynthesis (OP) after inhibition is dependent on irradiance (Fig. 6); and (IV) AP rates can be double those of OP (Fig. 3; Fig. 5). To constrain the range of possible biochemical mechanisms shaping this response, we constructed a simplified model of the electron transport reactions involved in oxygenic and anoxygenic photosynthesis. The model described here represents a fusion and further developed version of models described in Klatt *et al.*, 2015a, and 2015b.

Using this model we show that the inhibition and recovery of OP can be explained based on the interaction of H<sub>2</sub>S with an intermediate of the oxygen evolving complex (OEC), the generation of which is light dependent. Also, we show that the regulation of AP is substantially more complex than in previously studied cyanobacterial strains and cannot be explained by just considering the properties of SQR, i.e., its affinity for oxidized PQ and H<sub>2</sub>S. Instead, we suggest that H<sub>2</sub>S affects reactions downstream of PSI and we present two independent hypotheses concerning the light-dependency of the kinetics of H<sub>2</sub>S oxidation: (a) light-dependent activity of SQR and (b) multiple H<sub>2</sub>S oxidizing enzymes.

### 2.1. Oxygenic photosynthetic electron transport reactions

Cyanobacteria perform OP via electron transport reactions that are often represented as the Z-scheme (Fig. S3) and that have been intensively reviewed (reviewed e.g. in (Vermaas 2001; Govindjee *et al.*, 2010; Shevela *et al.*, 2013; Roach and Krieger-Liszka, 2014; Johnson 2016)). In brief, photosynthesis is initiated by the absorption of photons by pigments associated with PSII and PSI. The light energy is absorbed by accessory (also: antennae) pigments, such as phycocyanin, phycoerythrin, and other chlorophylls, is then transferred in the form of excitation energy to the reaction center (RC) chlorophyll *a* (Chl *a*). Via various intermediate redox reactions the excited state reaction center Chls drive the oxidation of the external electron donor H<sub>2</sub>O and the reduction of redox carriers NADP<sup>+</sup>. During electron transport a proton motive force (pmf) is generated, which drives the formation of ATP. Thus, during these “light reactions” of this linearly organized electron transport chain the excitation energy is converted into chemical energy in the form of reduced electron carriers and ATP. The NADPH and ATP generated during these electron transport chain reactions are driving CO<sub>2</sub> fixation in the “dark” reactions of the Calvin cycle. The individual reactions involved in oxygenic photosynthetic electron transport are described in greater detail below.

As cyanobacteria are often exposed to fluctuating environmental conditions, the photosynthetic electron transport and its regulation are complex (reviewed e.g. in (Peschek, 1999; Vermaas, 2001; Mullineaux 2014a; Nagarajan *et al.*, 2015)). There are multiple possibilities for alternative electron flow,

i.e., “branching” of the main electron transport highway. The “valves” of the linearly organized photosynthetic electron transport chain become important regulators when otherwise excessive oxidation or reduction of the transport chain components would occur.

Most prominently, the PQ pool, the cytochrome *b<sub>6</sub>f* complex, and the soluble electron carriers (plastocyanin or cytochrome *c<sub>553</sub>*) are also shared with the respiratory pathway (Fig. S3). PQ in the thylakoid membranes can receive electrons from succinate dehydrogenase (SDH). Reduced PQ, plastoquinol, can directly donate electrons to terminal oxidases, such as the plastoquinol oxidase (PTOX), the alternative respiratory terminal oxidase (ARTO) and cytochrome *bd*-type quinol oxidase (Cyd) (Lea-Smith et al., 2016). These oxidases couple the oxidation of PQ to the reduction of O<sub>2</sub>. In addition, the soluble cytochromes can donate electrons to a terminal oxidase, *aa<sub>3</sub>*-type cytochrome-*c* oxidase complex, instead of PSI. It is important to note for the discussion below that genes encoding both a cytochrome *c* oxidase and a *bd*-type quinol oxidase were identified in the strain *hensonii* genome. PQ reduction by SDH and PQ (or cytochrome) oxidation via terminal oxidases can likely occur simultaneously with photosynthetic electron transport, with O<sub>2</sub> reduction representing an electron “dump”. These reactions are likely important for cyanobacteria to maintain redox balance and prevent cell damage by photoinhibition but can also be dangerous (Murata et al., 2012). Cyclic electron transport can also occur via electron transfer from Ferredoxin to PQ. Furthermore, PSI and PSII have several other alternative electron acceptors, such as Flavodiiron proteins (Flv1-4) and a bidirectional [NiFe] hydrogenase (Hox) (Zhang *et al.*, 2012; Gutekunst *et al.*, 2014; Mullineaux, 2014b).

While possibly representing important regulatory functions to maintain redox balance, we assume here for simplicity that the rates of cyclic electron transport and other alternative electron flow reactions are insignificant compared to the photosynthetic electron mainstream reactions. Our methods do not allow for a quantification of the rates of these reactions and, as demonstrated below, their consideration is not needed to explain our data. We therefore limit our simplified model to the main components of the electron transport chain. Furthermore, we only concentrate on the reaction rates that can become the kinetic bottleneck for photosynthetic electron transport.

### 2.1.1. Formulation of Rate laws for oxygenic photosynthesis

In our model we assume that during non-saturating light conditions, light energy harvested in PSI or PSII limits OP, as manifest in the linear increase of OP with light in PI-curves (Fig. 7) (Klatt *et al.*, 2015b). Thus, the light energy harvested by accessory pigments that has migrated to the Chl *a* in the reaction center of PSII determines the rate ( $k_E$ ) of generation of an excited catalytic Chl *a* dimer in PSII (PSII\*). This can be formulated as

$$k_E = f_{II} E \text{ PSII} \quad (\text{S1})$$

where PSII is ground state Chl *a* in PSII and  $f_{II}$  is an absorbance cross-section factor that describes the efficiency of conversion of the externally available photon flux (E) into a volumetric rate of excitation. Upon the generation of an excited Chl *a* in PSII, charge separation between this Chl and primary electron

acceptor pheophytin (Pheo) occurs. The term charge separation describes the formation of a radical pair, P680<sup>•+</sup> and Pheo<sup>•-</sup> in PSII. This is the initiation of the electron transport reactions. Pheo rapidly reduces a bound plastoquinone (Q<sub>A</sub>), which donates electrons to a next redox carrier, another plastoquinone (Q<sub>B</sub>), which joins the mobile plastoquinone pool (PQ). While the initial reactions are extremely fast and occur directly in PSII RCs, PQ reduction and mobilization, and the following re-oxidation by *cyt b<sub>6</sub>f* are comparatively slow, which is related to the diffusion time of the PQ molecules in the thylakoid membranes (Whitmarsh and Govindjee, 1999). As a result, the redox state of the PQ pool is highly sensitive to imbalances between energy harvested in PSI and II, and to the rate saturation downstream of PSI. In other words, PQ is an important indicator of the overall redox state of the photosynthetic electron transport chain. Importantly, the availability of oxidized PQ can become the rate limiting factor for OP.

In our model the rate of electron transport initialization is, however, not only dependent on the availability of oxidized PQ but also to the availability of a functional oxygen evolving complex (OEC) that is not inhibited by H<sub>2</sub>S and can mediate the oxidation of H<sub>2</sub>O to O<sub>2</sub>. As mentioned above, charge separation leads to the formation of an oxidized RC Chl *a* (P680<sup>+</sup>). Electrons are rapidly transferred from a tyrosine residue of the OEC, which is in turn reduced by the Mn<sub>4</sub>O<sub>x</sub>Ca cluster of the OEC. Overall, the rate of PQ reduction by PSII ( $k_{OP}$ ) can thus be described as following Michaelis-Menten kinetics according to

$$k_{OP} = v_{OP} \text{PSII}^* \frac{\text{OEC}}{\text{OEC} + K_{OEC}} \frac{\text{PQ}_{\text{ox}}}{\text{PQ}_{\text{ox}} + K_{PSII}} \quad (\text{S2})$$

where PSII\* is the excited catalytic Chl *a* dimer in PSII, OEC is non-inhibited oxygen evolving complex and PQ<sub>ox</sub> is the oxidized part of the plastoquinone pool.  $v_{OP}$  is the maximum rate and  $K_{OEC}$  and  $K_{PSII}$  are the reaction constants describing the apparent affinity of PSII\* towards OEC and oxidized PQ.

To oxidize two water molecules and generate one O<sub>2</sub> molecule, four oxidizing equivalents in the Mn<sub>4</sub>O<sub>x</sub>Ca cluster have to be generated ultimately driven by 4 photons harvested by PSII. The exact reactions occurring in the OEC are still to be fully described (Messinger and Renger, 2008; Jablonsky and Lazar, 2008). Clearly, the OEC undergoes several transitional stages (initially described as S states; (Kok *et al.*, 1970)) before release of an O<sub>2</sub> molecule. In our model, we use “OEC<sub>ox</sub>” to summarize multiple intermediate stages of the OEC. The process described by  $k_{OP}$  in Eq. S2 results in the formation of the oxidizing equivalents OEC<sub>ox</sub>. The rate of O<sub>2</sub> release from the OEC will depend on the availability of OEC<sub>ox</sub> which can be described as

$$k_{O2} = v_{O2} \frac{\text{OEC}_{\text{ox}}}{\text{OEC}_{\text{ox}} + K_{O2}} \quad (\text{S3})$$

Klatt *et al.* (2015b) hypothesized that the inhibitory effects of H<sub>2</sub>S is based on interaction with an intermediate of the OEC, OEC<sub>ox</sub>, according to

$$k_{S1} = \kappa \text{OEC}_{\text{ox}} [\text{H}_2\text{S}] \quad (\text{S4})$$

De-inhibition kinetics, i.e. the rate of release of H<sub>2</sub>S from the OEC, can be described as

$$k_{S_2} = \sigma \text{OEC}_{\text{ox}} : [\text{H}_2\text{S}] \quad (\text{S5})$$

where  $\text{OEC} : [\text{H}_2\text{S}]$  describes the inhibited state of the OEC.

The reduction of PQ coupled to oxidation of OEC described by Eq. S2 regenerates ground state Chl *a* in PSII. If insufficient PQ<sub>ox</sub> or OEC are available, PSII\* consequently accumulates causing enhanced photoinhibition, i.e., degradation of the D1 subunit of PSII. In our model, we describe photoinhibition as PSII degradation upon an additional photon harvesting event in the presence of PSII\* (Nishiyama et al., 2006). The rate of PSII degradation will therefore depend on the availability of the excited catalytic Chl *a* dimer in PSII (PSII\*) and irradiance (E) according to

$$k_D = v_D \frac{E}{E + K_{D1}} \frac{\text{PSII}^*}{\text{PSII}^* + K_{D2}} \quad (\text{S6})$$

$K_{D1}$  was chosen such that the rate begins to saturate at high light intensities because we also assumed that the efficiency of photoinhibition is light-dependent (Keren et al., 1997). Degraded subunits of PSII are repaired at a rate described by

$$k_R = v_R \frac{\text{PSII}_d}{\text{PSII}_d + K_R} \quad (\text{S7})$$

where PSII<sub>d</sub> is non-active PSII. This reaction leads to the replenishment of active ground-state PSII.

The successful initialization of electron transport yields reduced PQ according to Eq. S2. Oxidation of PQ occurs via the cyt *b<sub>6</sub>f* complex and plastocyanin (or cytochrome *c<sub>553</sub>*), and is driven by light energy harvested in PSI. From PSI electrons are transferred via a series of fast intermediate redox reactions to ferredoxin, which, via ferredoxin-NADP<sup>+</sup> oxidoreductase (FNR), can reduce NADP<sup>+</sup>. The rate of PQ oxidation can thus be described as

$$k_{\text{tot}} = f_I \beta E \frac{\text{NADP}^+}{\text{NADP}^+ + K_N} \frac{\text{PQ}_{\text{red}}}{\text{PQ}_{\text{red}} + K_{C3}}, \text{ with} \quad (\text{S8})$$

$$\beta = (1 + \beta_0 f_{II} \frac{\text{PQ}_{\text{red}}}{\text{PQ}_{\text{tot}}}) \quad (\text{S9})$$

where  $f_I$  is an absorbance cross-section factor of PSI. The factor  $\beta$  introduces excitation energy transfer from PSII to PSI dependent on redox state of the PQ pool. Namely, with increasing reduced PQ (PQ<sub>red</sub>) in the total PQ pool (PQ<sub>tot</sub>) an increasing fraction  $\beta$  of light energy harvested in PSII is transferred to PSI, which represents a mechanism to prevent an electron “traffic jam”.

The process described by Eq. S8 yields oxidized PQ that is available again for reduction by PSII and NADPH. The redox carrier NADPH is used in the Calvin cycle for CO<sub>2</sub> reduction. The rate of CO<sub>2</sub> fixation coupled to NADPH oxidation, which depends on the maximum rate of CO<sub>2</sub> reduction, and the availability of NADPH, which can be formulated as

$$k_{CO_2} = v_{CO_2} \frac{NADPH}{NADPH + K_{CO_2}} \quad (S10)$$

The model for oxygenic photosynthetic electron transport is solved by finding steady state solutions to six differential equations:

$$\frac{dPSII^*}{dt} = k_E - k_{OP} - k_D \quad (S11)$$

describes the rate of change in the fraction of RC Chl *a* that is in excited state. PSII\* is generated at the rate  $k_E$  (Eq. S1) and decreases due to degradation of PSII\* and by OEC reduction at rates  $k_D$  and  $k_{OP}$ , respectively. The ground state fraction of PSII is generated at a rate described as

$$\frac{dPSII}{dt} = k_{OP} + k_R - k_E \quad (S12)$$

as a result of OEC oxidation coupled to PQ reduction ( $k_{OP}$ ) and repair of degraded PSII ( $k_R$ ). The rate of PSII decrease by excitation is  $k_E$ . Importantly, the sum of all fractions of photosystem II are constant in our model, which can be written as

$$PSII_{tot} = PSII + PSII^* + PSII_d \quad (S13)$$

The fraction of unstable intermediately oxidized OEC (OEC<sub>ox</sub>) in the total OEC pool,

$$OEC_{tot} = OEC + OEC_{ox} + OEC_{ox}:H_2S, \quad (S14)$$

is increasing during re-establishment of ground state PSII and PQ reduction ( $k_{OP}$ ) and “de-inhibition” by H<sub>2</sub>S ( $k_{S2}$ ), and decreasing due to inhibition ( $k_{S1}$ ) and H<sub>2</sub>O oxidation ( $k_{O2}$ ) The rate of change of the oxidized fraction of OEC (OEC<sub>ox</sub>) is thus described as

$$\frac{dOEC_{ox}}{dt} = k_{OP} + k_{S2} - k_{O2} - k_{S1}, \quad (S15)$$

while the rate of change of the fraction of OEC in the total OEC pool follows

$$\frac{dOEC}{dt} = k_{O2} - k_{OP}, \quad (S16)$$

which describes that OEC is a result of H<sub>2</sub>O oxidation ( $k_{OP}$ ), and regeneration of PSII and reduction of PQ ( $k_{OP}$ ). Similarly, the differential equation

$$\frac{dPQ_{ox}}{dt} = k_{tot} - k_{OP} \quad (S17)$$

describes the rate of change of the oxidized fraction of the PQ pool (PQ<sub>ox</sub>) as the result of PQ reduction by PSII\* ( $k_{OP}$ ) and PQ oxidation driven by light in PSI, coupled to NADP<sup>+</sup> reduction ( $k_{tot}$ ). The sum of the different fractions of the PQ pool are again set constant, i.e.,

$$PQ_{tot} = PQ_{red} + PQ_{ox}, \quad (S18)$$

which also applies to the total NADP<sup>+</sup>/NADPH pool (NADP<sub>tot</sub>), i.e.,



$$\text{NADP}_{\text{tot}} = \text{NADP}^+ + \text{NADPH}. \quad (\text{S19})$$

In our model, NADPH is generated during PQ oxidation ( $k_{\text{tot}}$ ) and consumed by CO<sub>2</sub> fixation ( $k_{\text{CO}_2}$ ), which is described as

$$\frac{d\text{NADPH}}{dt} = k_{\text{tot}} - k_{\text{CO}_2} \quad (\text{S20})$$

By setting  $d\text{PSII}^*/dt = 0$ ,  $d\text{PSII}/dt = 0$ ,  $\text{OEC}_{\text{ox}}/dt = 0$ ,  $d\text{OEC}/dt = 0$ ,  $d\text{PQ}_{\text{ox}} = 0$  and  $d\text{NADPH}/dt = 0$ , the steady-state redox state of the PSII, OEC, PQ and NADP pool and the corresponding rate of oxygenic photosynthetic electron transport can be calculated using Eqs. S1 – S11 for any given values of [H<sub>2</sub>S] and E.

Our data was fitted using a numerical implementation of the model into R with the deSolve package (Soetaert et al., 2010). When testing reasonable values for the maximum rates  $v_x$ , affinity constants  $K_x$  and for the factors  $f_l$  and  $f_{II}$  in Eqs. S1 – S10 we considered that at saturating light intensities, rates of OP stop increasing linearly with light (Fig. 7) and rates of CO<sub>2</sub> fixation are expected to become the bottleneck of OP rates. Therefore,  $K_{\text{CO}_2}$  and  $v_{\text{CO}_2}$  in Eq. S10 had to be set substantially higher than all other maximum rates and affinity constants to achieve that  $k_{\text{CO}_2}$  limits the overall electron transport at high light only. We also considered that in most cyanobacteria PSI RCs are more abundant in the thylakoid membrane than PSII to prevent that  $k_{\text{tot}}$  becomes the bottleneck for electron transport because an electron transport “traffic jam” can cause photodamage to PSII, as described above. We therefore set  $f_l > f_{II}$ , which revealed very good agreement with the experimental data (see dashed line in Fig. 7).

In the formulation of OEC<sub>ox</sub> inhibition by H<sub>2</sub>S (Eq. S4), the rate of inhibition will be dependent on light because the abundance of OEC<sub>ox</sub> is light-dependent (see Eq. S1 and S2). Klatt *et al.* (2015b) have indeed observed pronounced light-dependent inhibition kinetics in their studied *Planktothrix* strain. We could not observe similar kinetics in *Leptolyngbya* sp. strain hensonii — H<sub>2</sub>S instantaneously inhibited OP at very low concentrations. Therefore,  $\kappa$  was chosen to be substantially higher than in the model for the cyanobacteria previously described in Klatt et al. (2015b).

After exposure to H<sub>2</sub>S, oxygenic photosynthetic rates only started to recover after a fixed time frame of ~30 min. This could be explained by considering in our model that  $\sigma \ll \ll \kappa$  in Eqs. S4 and S5, which implies that any available OEC<sub>ox</sub> is rapidly inhibited by H<sub>2</sub>S, while the back reaction is so slow that the inhibited state of the OEC dominates for an extended time frame even after removal of externally available H<sub>2</sub>S. Furthermore, the recovery rate of oxygenic photosynthesis from H<sub>2</sub>S inhibition was light-dependent in strain hensonii (Fig. 6). Inhibition of photosynthesis by H<sub>2</sub>S on the donor side of PSII, is expected to cause photodamage of PSII (Jegerschoeld et al., 1990) because the excitation energy cannot be converted into chemical energy in the form of electron transport. We adjusted constants in our model such that an active OEC is only slowly re-generated even after depletion of H<sub>2</sub>S. Thus, excited/oxidized RC Chl *a* (PSII\*) is more abundant than without “H<sub>2</sub>S-history” and rates are highly dependent on light (E) excite light determines degradation rates (Eq. S6). The output of our model was in remarkable

agreement with the experimental data (see black lines in Fig. 6). We therefore conclude that the light-dependent recovery rates can be explained based on the intertwined kinetics of OEC inhibition by H<sub>2</sub>S and photoinhibition. i.e., light-dependent degradation of D1 in PSII.

## 2.2. Anoxygenic electron transport reactions

The model considers that in photosynthetically versatile cyanobacteria, electrons derived from H<sub>2</sub>S oxidation enter the electron transport chain at the level of the PQ pool via SQR (Fig. S3). Thus, the electron transport pathways of AP and OP intersect in the PQ pool. Cyanobacteria therefore use all redox active compounds downstream of PQ, towards NADP<sup>+</sup> and ultimately to CO<sub>2</sub>, for the transport of both H<sub>2</sub>S- and H<sub>2</sub>O-derived electrons. It is thus a crucial assumption in our model that the kinetics of photosynthetic electron transport beyond PQ are independent of photosynthetic mode unless direct modifications by H<sub>2</sub>S occur.

### 2.2.1. Formulations of rate laws for anoxygenic photosynthetic electron transport

The rate of H<sub>2</sub>S oxidation is expected to be dependent on the affinity of SQR to H<sub>2</sub>S and to PQ, which can be formulated as

$$k_{AP} = v_{\max} \frac{[\text{H}_2\text{S}]}{K_M + [\text{H}_2\text{S}]} \frac{\text{PQ}_{\text{ox}}}{K_{\text{SQR}} + \text{PQ}_{\text{ox}}} \quad (\text{S21})$$

according to Klatt et al. (2015a). The differential equation S17 thus changes to

$$\frac{d\text{PQ}_{\text{ox}}}{dt} = k_{\text{tot}} - k_{\text{OP}} - k_{AP} \quad (\text{S22})$$

The rate of AP depends on the availability of H<sub>2</sub>S and redox status of the PQ pool.

In our model all rates are in  $\mu\text{M electrons s}^{-1}$ . The rate of H<sub>2</sub>S depletion by AP can be calculated as

$$\frac{d\text{H}_2\text{S}}{dt} = 0.5k_{AP} \quad (\text{S23})$$

by considering that H<sub>2</sub>S is oxidized to zero-valent sulfur according to  $\text{H}_2\text{S} \rightarrow \text{S}^0 + 2 \text{e}^-$ . The rate of total sulfide depletion can be derived from the change of H<sub>2</sub>S concentration at every time point by considering the pH according to

$$[\text{S}_{\text{tot}}] = [\text{H}_2\text{S}]\left(1 + \frac{K_1}{[\text{H}_3\text{O}^+]}\right) \quad (\text{S24})$$

H<sub>2</sub>S entirely inhibits the OEC and thus the reduction of PQ by PSII. Consequently, PQ redox does not depend on competitive reductive reactions but on H<sub>2</sub>S availability and the bottleneck reactions downstream of PQ, which determine the re-oxidation rate of PQ. Under non-saturating light conditions the bottleneck is light harvested in PSI. At high light intensities other reactions downstream of PSI namely CO<sub>2</sub> fixation ( $k_{\text{CO}_2}$ , Eq. S10) might become the bottleneck of photosynthetic reaction thus

ultimately governing also the rate of H<sub>2</sub>S oxidation. We observed that electron transport rates of AP were double those of OP at high light conditions (Fig. 5; Fig. 7). High H<sub>2</sub>S concentration, however, caused a decrease of rates (Fig. 5). We therefore reformulated Eq. S10 to

$$k_{CO_2} = v_{CO_2} \gamma \delta \frac{NADPH}{NADPH + K_{CO_2}}, \quad (S23)$$

where

$$\gamma = 1 + \gamma_0 \frac{[H_2S]}{[H_2S] + K_E}, \quad (S24)$$

which describes the enhancement of maximum rates of CO<sub>2</sub> fixation with H<sub>2</sub>S, and where

$$\delta = 1 - \delta_0 \frac{[H_2S]}{[H_2S] + K_I}, \quad (S25)$$

which describes the inhibition of CO<sub>2</sub> fixation by H<sub>2</sub>S. By setting  $K_E < K_I$ , the enhancement of rates is pronounced at low [H<sub>2</sub>S] and is outweighed by the inhibitory effect at higher [H<sub>2</sub>S]. Also, CO<sub>2</sub> fixation only becomes the bottleneck for electron transport at high light intensities E. Thus, the modulation of electron transport rates by H<sub>2</sub>S also only become apparent at high light intensities. At lower light intensities, AP strictly depends on [H<sub>2</sub>S], PQ redox and light harvested in PSI.

The numerical implementation of this model gave excellent results for the enhancement and inhibition of AP at higher E. However, we could not explain the light dependent slope of rates of AP in Fig. 5. This is because our model predicts that rates of AP are increasing with [H<sub>2</sub>S] until a light-dependent maximum is reached, i.e., until PSI turns into the bottleneck for electron transport. Below this maximum, light does not affect rates of AP (Klatt et al., 2015a). We could only achieve an agreement of our model with the experimental data by using either of two assumptions: (i) Light modulates the activity of SQR by increasing  $v_{max}$  in Eq. S21 and (ii) there are two sulfide oxidizing enzymes that donate electrons into the electron transport chain at different levels. In the following, we introduce two different versions of the model based on these two assumptions.

#### 2.2.1.1. Light-dependent $v_{max}$

The light dependency of rates of AP at low H<sub>2</sub>S concentrations could be explained by light-dependent activity of SQR. This could be, for instance, due to light-dependent expression of SQR or even due to multiple SQRs, the relative abundance of which is controlled by light. In any case, this can be modeled by introducing light-dependent changes of  $v_{max}$  in Eq. S21 as

$$k_{AP\_B} = v_{max} \alpha \frac{[H_2S]}{K_M + [H_2S]} \frac{PQ_{ox}}{K_{SQR} + PQ_{ox}}, \quad (S26)$$

where  $\alpha$  increases with E according to

$$\alpha = \left(1 + \alpha_0 \frac{E}{E + K_\alpha}\right) \quad (S27)$$

The changes of H<sub>2</sub>S oxidation rates in response to light were, however, instantaneous, which means that *hensonii* would possess a mechanism to continuously adjust the activity of SQR according to momentary irradiance. We considered this unlikely and thus considered an alternative explanation: the presence of a second, unidentified, sulfide oxidizing enzyme (“USO”). This assumption could explain our data as described below.

### 2.2.1.2. An additional sulfide oxidizing enzyme (“USO”)

Assuming that a second sulfide oxidizing enzyme (“USO”), such as flavocytochrome c oxidase, exists, we implemented H<sub>2</sub>S oxidation by this enzyme into our model as

$$k_{AP2} = v_{\max 2} \frac{[H_2S]}{K_{M2} + [H_2S]} \frac{"EC"_{ox}}{K_{"USO"} + "EC"_{ox}},$$

where “EC<sub>ox</sub>” is any component of the electron transport chain between PQ and PSII. EC<sub>ox</sub> thus receives electrons from both PQ and “USO”. The rate of PQ oxidation (Eq. S8) thus changes to

$$k_{PQ} = v_c \frac{"EC"_{ox}}{"EC"_{ox} + K_{C1}} \frac{PQ_{red}}{PQ_{red} + K_{PQ}}$$

and is not directly coupled to reduction of NADP<sup>+</sup> anymore. NADP<sup>+</sup> reduction via PSI in our model is instead coupled to EC oxidation according to

$$k_{tot} = f_I \beta E \frac{NADP^+}{NADP^+ + K_N} \frac{"EC"_{red}}{"EC"_{red} + K_{C2}},$$

where  $\beta$  is defined by Eq. S9.

Consequently, also the differential equation describing the rate of change of the oxidized fraction of the PQ pool (Eq. S22) had to be altered to

$$\frac{dPQ_{ox}}{dt} = k_{PQ} - k_{OP} - k_{AP}$$

We additionally introduced the rate of change of the oxidized fraction of the EC pool as

$$\frac{d"EC"_{ox}}{dt} = k_{tot} - k_{OP} - k_{AP2}$$

and when finding a solution the sum of the total EC pool was constant as

$$"EC"_{tot} = "EC"_{ox} + "EC"_{red}.$$

The relative contribution of the two sulfide oxidizing enzymes to the overall sulfide oxidation activity will depend on their affinity to H<sub>2</sub>S and the redox state of the respective electron acceptor in the transport chain. Assuming that “USO” donates electrons downstream of PQ it will cause its electron acceptor to become more reduced. This electron acceptor EC is also the electron acceptor for PQ. The activity of “USO” thus affects the oxidation state of PQ and thus SQR activity. At low light conditions competition for the electron transport chain takes effect. This competition scenario can occur when setting

$K_{PQ}$  and  $K_{C1} > K_N$  and  $K_{C2}$ , which will lead to accumulation of reduced PQ at increasing H<sub>2</sub>S concentrations. Fig. S4A shows that consequently rates of H<sub>2</sub>S oxidation by SQR abruptly stop increasing at very low H<sub>2</sub>S. This effect is most pronounced when setting the affinity constant of “USO” ( $K_{M2}$ ) lower than that of SQR ( $K_M$ ). At higher light, rates of overall electron transport through PSI are sufficiently high to keep both the reduced fraction of PQ and “EC” low enough to circumvent that PQ oxidation is limiting SQR activity at a low H<sub>2</sub>S concentration (Fig. S4B). Then the rates of sulfide oxidation are strictly determined by the affinities to H<sub>2</sub>S and not to the electron acceptors PQ and EC.

Our data set does not enable evaluation of both hypotheses. Regardless, the main conclusion of our modeling effort is that anoxygenic photosynthesis in *Leptolyngbya* sp. strain hensonii is controlled by substantially more complex mechanisms than expected based on previous studies, e.g. in *Planktothrix* FS39 described by Klatt et al. (2015a). Most prominently, rates of AP cannot be explained by assuming a steady pool of one single sulfide oxidizing enzyme.

### 3. SUPPLEMENTAL FIGURES

**Figure S1.** A). Schematic diagram of the experimental setup used in this study to measure rates of oxygenic and anoxygenic photosynthesis using microsensors. Cyanobacterial biofilms grown on glass fiber filters (a) were fixed on polyester fibrous web (b) that separated a top and bottom reservoir of media. After measurements of oxygenic photosynthesis in the uppermost layer of the biofilm, neutralized  $\text{Na}_2\text{S}$  solution was injected into both bottom and top reservoir and rates of oxygenic and anoxygenic photosynthesis, and the local  $\text{H}_2\text{S}$  concentration within the biofilm were monitored. A gentle flow of  $\text{N}_2$  gas facilitated mixing. B). View looking down on the experimental setup with the oxygen, pH, and sulfide (dark) microsensors and the halogen lamps.

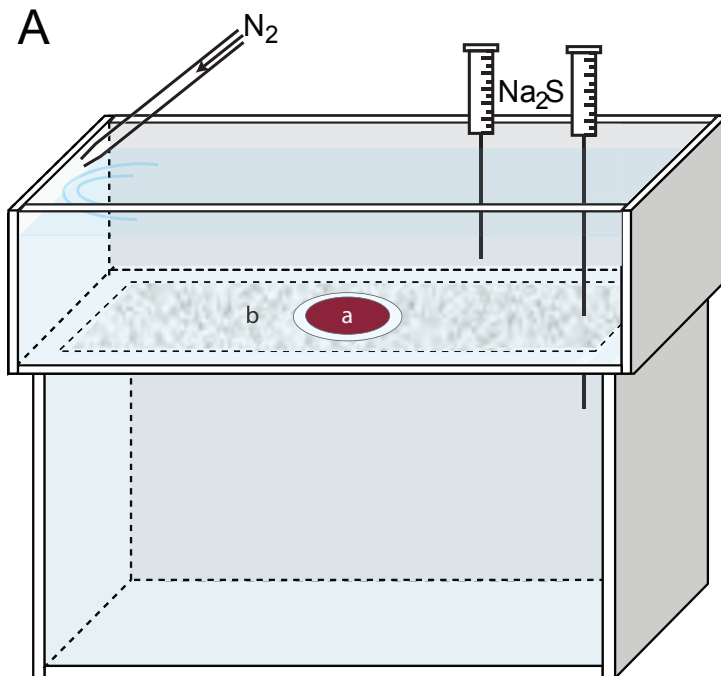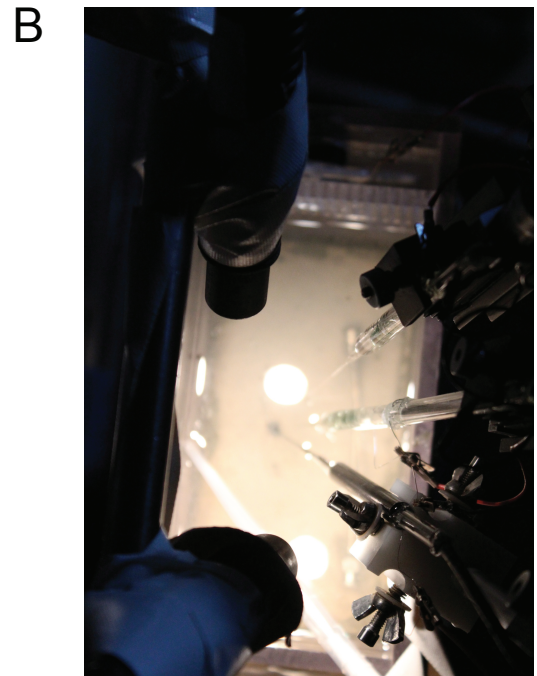

**Figure S2.** Light microscopy micrograph of strain hensonii.

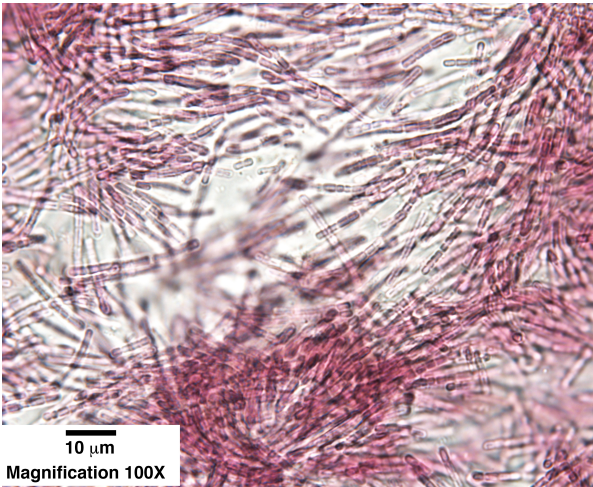

**Figure S3.** The electron transport chain of photosynthesis (the Z-scheme) showing the electron flow and the potential of redox pairs involved (A). The simplified Z-scheme used in model described here is shown in (B). Modified from Allen (2003) and Mullineaux (2014).

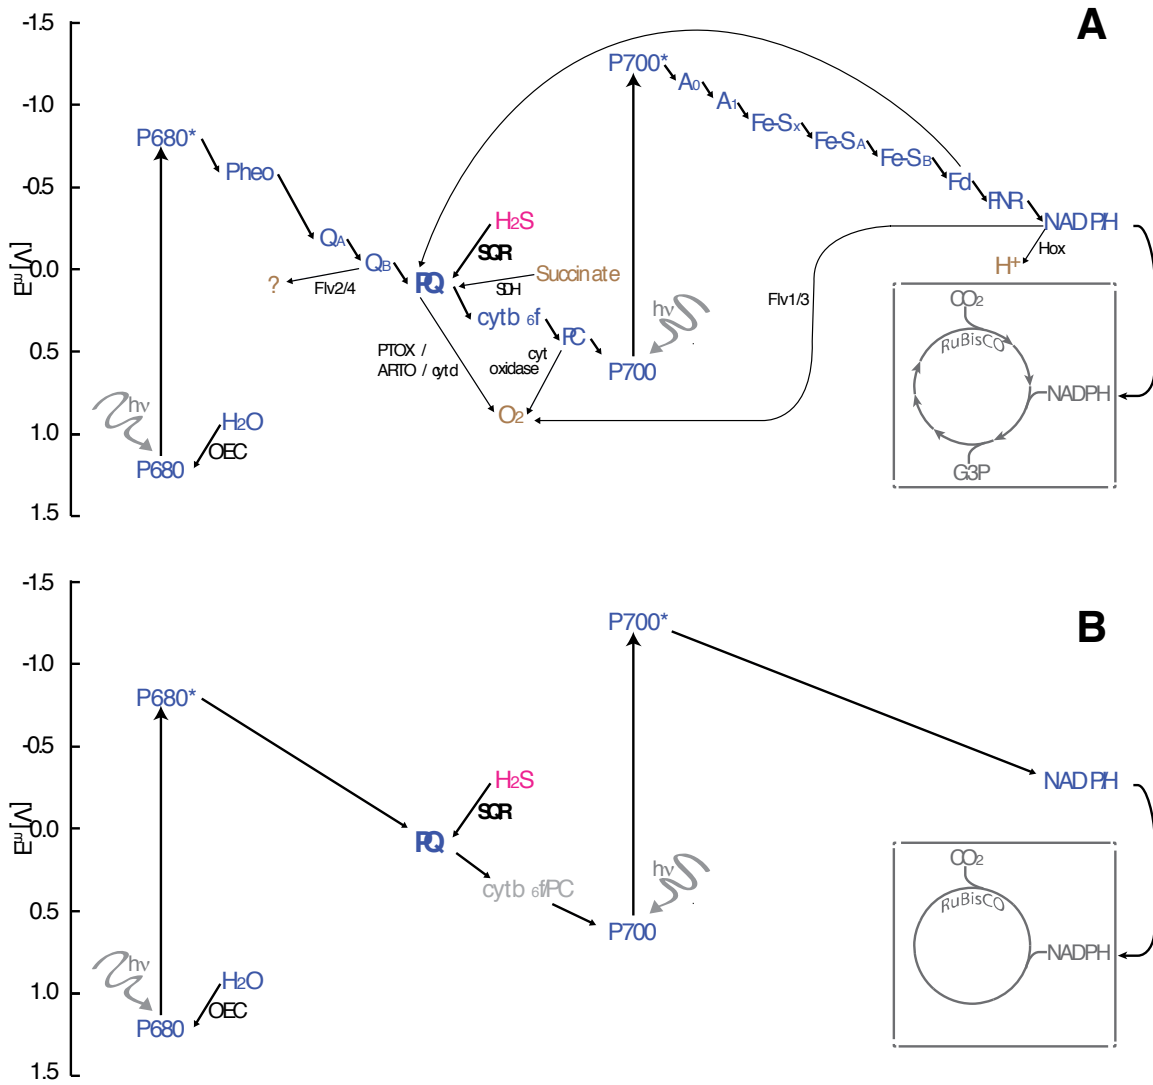



**Figure S4.** Modeled rates of electron transport resulting from H<sub>2</sub>S oxidation by SQR ( $k_{AP}$ ) and “USO” ( $k_{AP2}$ ) expressed as % gross anoxygenic photosynthesis (GAP) of maximum oxygenic photosynthesis (GOP<sub>max</sub>) dependent on H<sub>2</sub>S concentration at 36 and 137  $\mu\text{mol photons m}^{-2} \text{s}^{-1}$  (A and B, respectively). The steady state fraction of oxidized PQ and EC are also shown in % of the total pools.

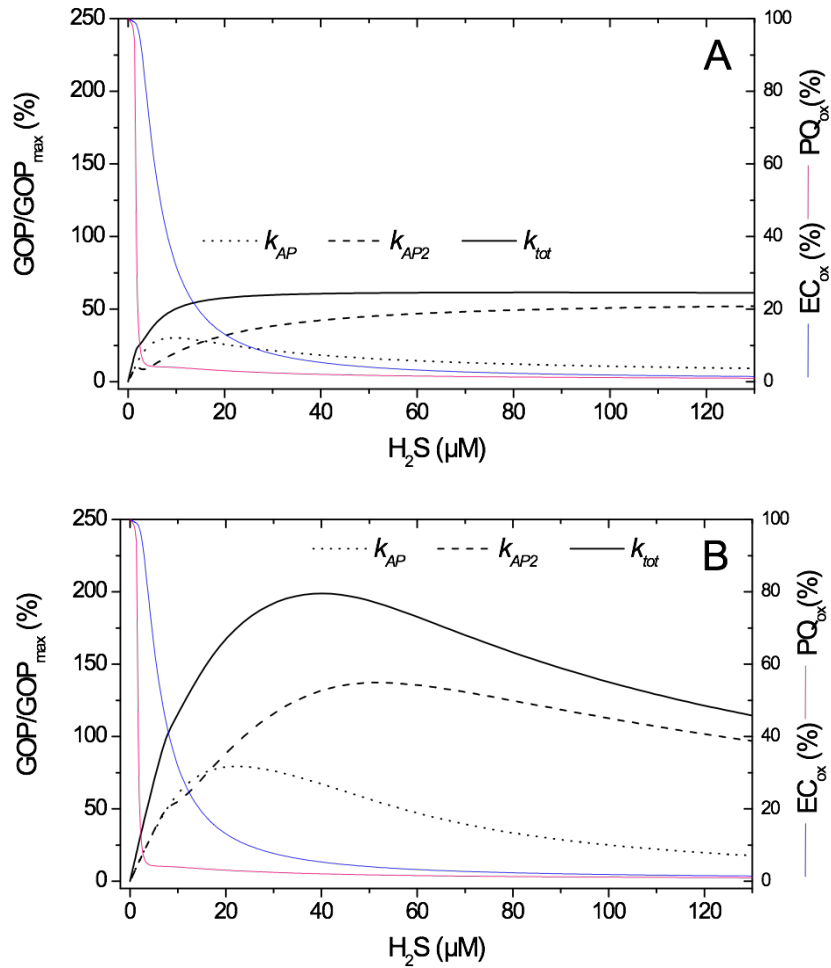

**Figure S5.** Maximum likelihood phylogeny of SQR sequences. Classification of SQR orthologs is based on Gregersen et al., 2011. Bootstrap support values >90 based on 1000 bootstrap samplings are shown for each node.

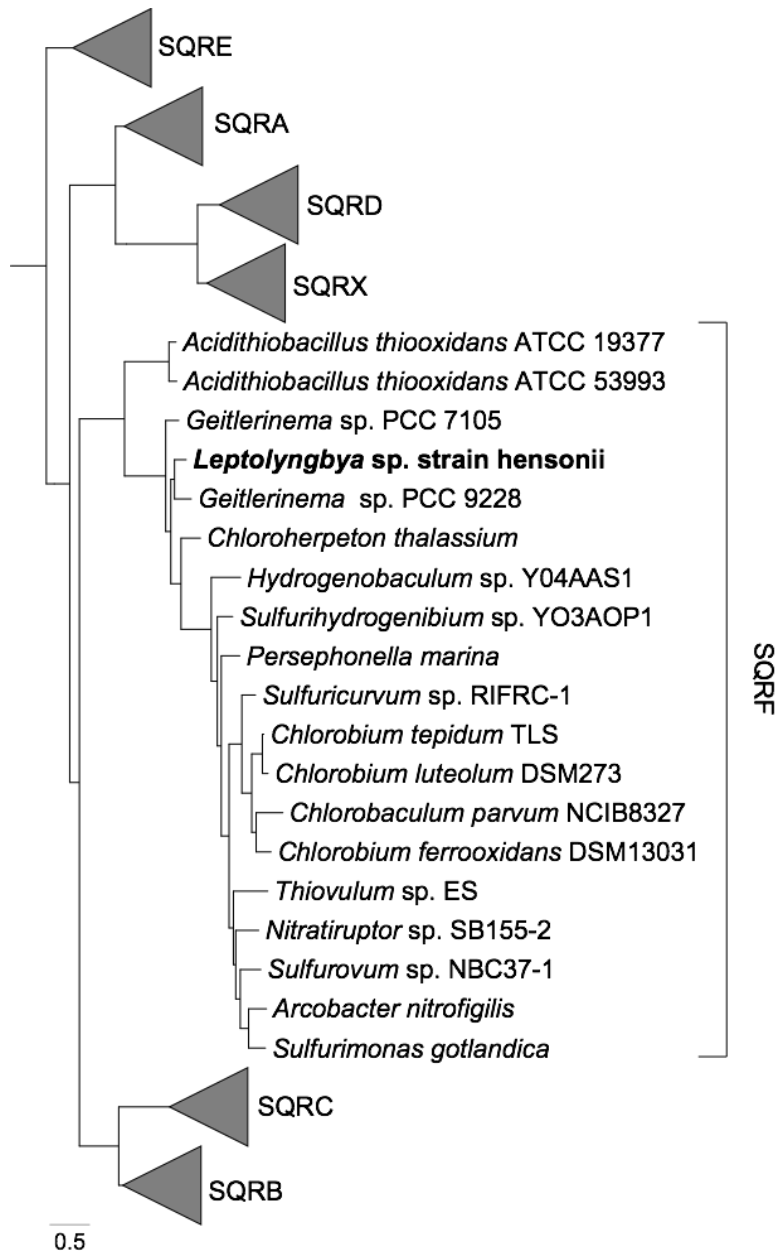

**Figure S6.** Maximum likelihood phylogeny of HpnP sequences. Black circles indicate bootstrap support values >85 based on 1000 bootstrap samplings. Accession numbers for all sequences are provided in Table S3.

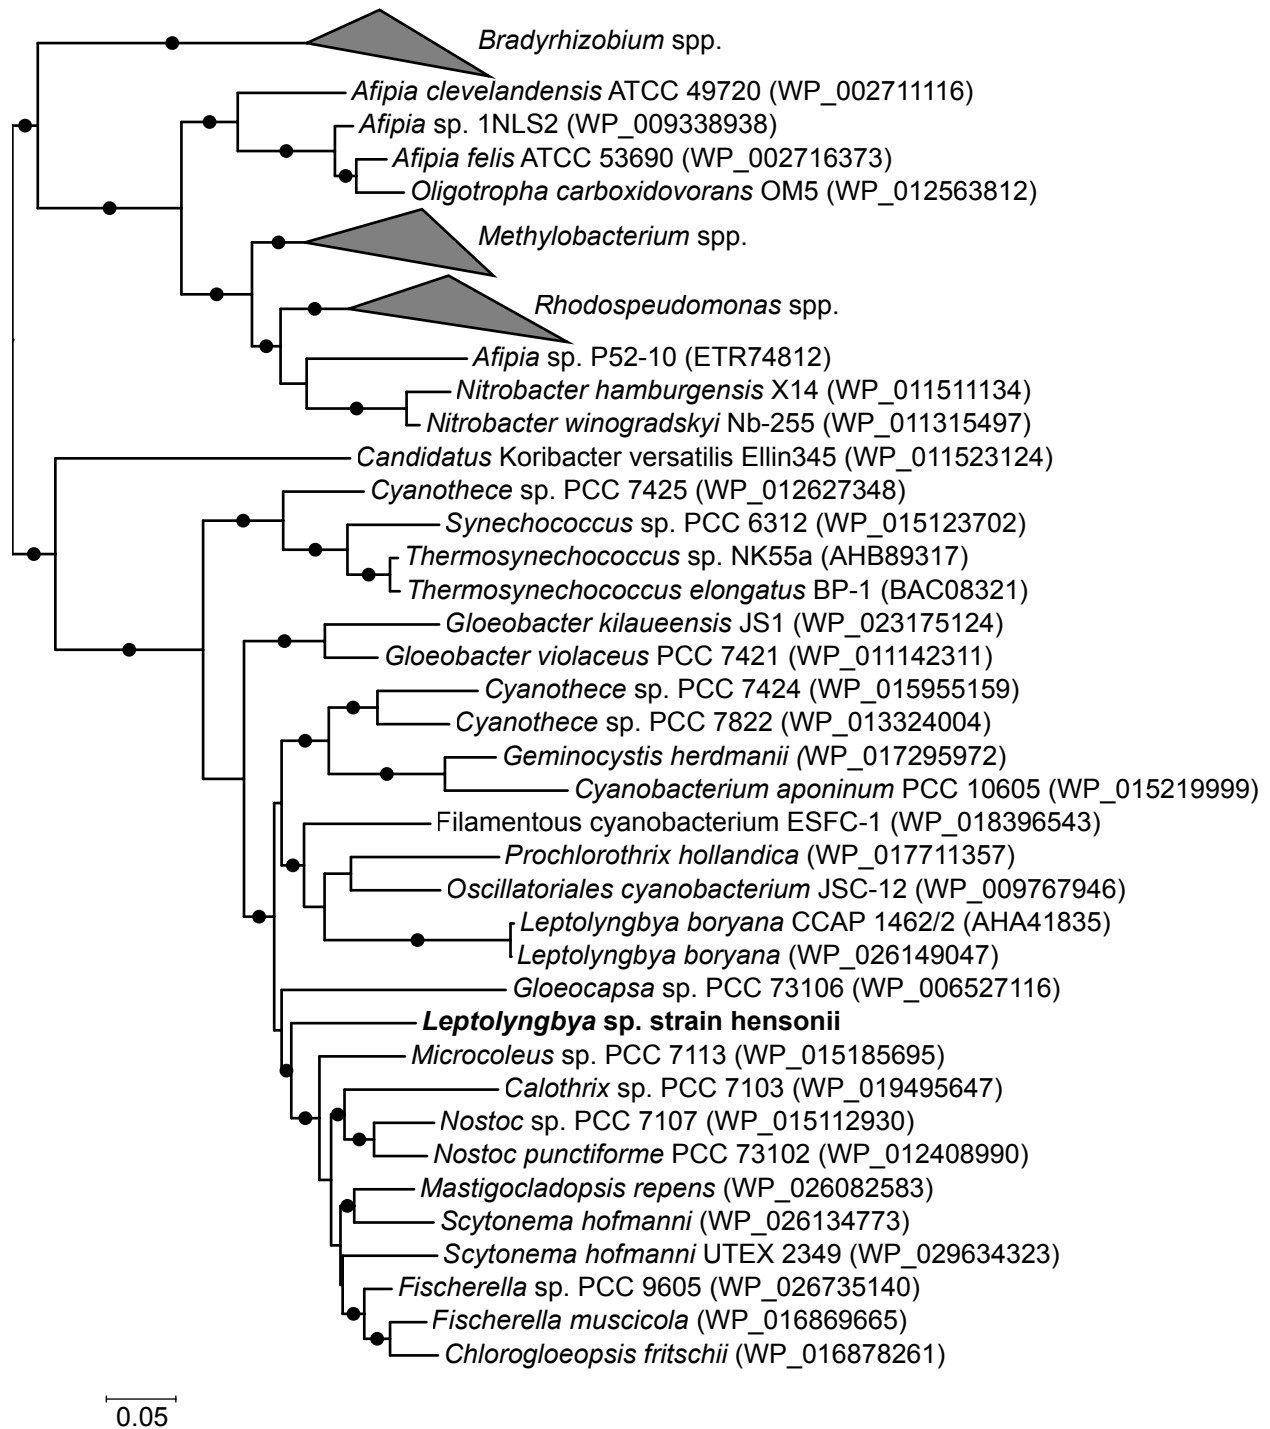

#### 4. SUPPLEMENTAL TABLES

**Table S1.** Single copy genes used to evaluate genome completeness.

| Description                                 | COG     | Count |
|---------------------------------------------|---------|-------|
| Arginyl-tRNA synthetase                     | COG0018 | 1     |
| DNA-directed RNA polymerase subunit alpha   | COG0202 | 1     |
| DNA-directed RNA polymerase subunit beta    | COG0085 | 2     |
| GTP-binding protein YchF                    | COG0012 | 1     |
| Histidyl-tRNA synthetase                    | COG0124 | 1     |
| Isoleucyl-tRNA synthetase                   | COG0060 | 1     |
| Leucyl-tRNA synthetase                      | COG0495 | 1     |
| Methionyl-tRNA synthetase                   | COG0143 | 1     |
| O-sialoglycoprotein endopeptidase           | COG0533 | 1     |
| Phenylalanyl-tRNA synthetase, alpha subunit | COG0016 | 1     |
| Protein translocase subunit secY alpha      | COG0201 | 1     |
| Ribosomal protein L1P                       | COG0081 | 1     |
| Ribosomal protein L22                       | COG0091 | 1     |
| Ribosomal protein L2P                       | COG0090 | 1     |
| Ribosomal protein L3P                       | COG0087 | 1     |
| Ribosomal protein L4P                       | COG0088 | 1     |
| Ribosomal protein L5P                       | COG0094 | 1     |
| Ribosomal protein L6P                       | COG0097 | 1     |
| Ribosomal protein L11P                      | COG0080 | 1     |
| Ribosomal protein L13P                      | COG0102 | 1     |
| Ribosomal protein L14P                      | COG0093 | 1     |
| Ribosomal protein L15P                      | COG0200 | 1     |
| Ribosomal protein L16P                      | COG0197 | 1     |
| Ribosomal protein L18                       | COG0256 | 1     |
| Ribosomal protein S2P                       | COG0052 | 1     |
| Ribosomal protein S3P                       | COG0092 | 1     |
| Ribosomal protein S4P                       | COG0522 | 1     |
| Ribosomal protein S5P                       | COG0098 | 1     |
| Ribosomal protein S7P                       | COG0049 | 1     |

| Description                              | COG     | Count |
|------------------------------------------|---------|-------|
| Ribosomal protein S8P                    | COG0096 | 1     |
| Ribosomal protein S9P                    | COG0103 | 1     |
| Ribosomal protein S11P                   | COG0100 | 1     |
| Ribosomal protein S12P                   | COG0048 | 1     |
| Ribosomal protein S13P                   | COG0099 | 1     |
| Ribosomal protein S15P/S13E              | COG0184 | 1     |
| Ribosomal protein S17P                   | COG0186 | 1     |
| Ribosomal protein S19P                   | COG0185 | 1     |
| Ribosomal protein alanyl-tRNA synthetase | COG0525 | 1     |
| Seryl-tRNA synthetase                    | COG0172 | 1     |
| Signal recognition particle subunit FFH  | COG0541 | 1     |

**Table S2.** Accession numbers of the HpnP sequences included in Figure S3.

| Query                                            | Accession Number |
|--------------------------------------------------|------------------|
| <i>Scytonema hofmanni</i>                        | WP_026134773     |
| <i>Nostoc punctiforme</i> PCC 73102              | WP_012408990     |
| <i>Microcoleus</i> sp. PCC 7113                  | WP_015185695     |
| <i>Mastigocladopsis repens</i>                   | WP_026082583     |
| <i>Chlorogloeopsis fritschii</i>                 | WP_016878261     |
| <i>Scytonema hofmanni</i> UTEX 2349              | WP_029634323     |
| <i>Fischerella</i> sp. PCC 9605                  | WP_026735140     |
| <i>Fischerella muscicola</i>                     | WP_016869665     |
| <i>Nostoc</i> sp. PCC 7107                       | WP_015112930     |
| <i>Gloeobacter violaceus</i> PCC 7421            | WP_011142311     |
| Filamentous cyanobacterium ESFC-1                | WP_018396543     |
| <i>Thermosynechococcus elongatus</i> BP-1        | BAC08321         |
| <i>Thermosynechococcus</i> sp. NK55a             | AHB89317         |
| Oscillatoriales cyanobacterium JSC-12            | P_009767946      |
| <i>Prochlorothrix hollandica</i>                 | WP_017711357     |
| <i>Leptolyngbya boryana</i>                      | WP_026149047     |
| <i>Cyanothece</i> sp. PCC 7822                   | WP_013324004     |
| <i>Calothrix</i> sp. PCC 7103                    | WP_019495647     |
| <i>Synechococcus</i> sp. PCC 6312                | WP_015123702     |
| <i>Leptolyngbya boryana</i> CCAP 1462/2          | AHA41835         |
| <i>Cyanothece</i> sp. PCC 7425                   | WP_012627348     |
| <i>Gloeobacter kilauensis</i> JS1                | WP_023175124     |
| <i>Cyanothece</i> sp. PCC 7424                   | WP_015955159     |
| <i>Cyanobacterium aponinum</i> PCC 10605         | WP_015219999     |
| <i>Geminocystis herdmanii</i>                    | WP_017295972     |
| <i>Gloeocapsa</i> sp. PCC 73106                  | WP_006527116     |
| Candidatus <i>Koribacter versatilis</i> Ellin345 | WP_011523124     |
| <i>Afipia</i> sp. 1NLS2                          | WP_009338938     |
| <i>Bradyrhizobium</i> sp. ARR65                  | WP_024508762     |
| <i>Afipia felis</i> ATCC 53690                   | WP_002716373     |

| Query                              | Accession Number |
|------------------------------------|------------------|
| Bradyrhizobium sp. Ai1a-2          | WP_027581924     |
| Bradyrhizobium sp. BTAi1           | WP_012043107     |
| Bradyrhizobium sp. ORS 375         | WP_009026937     |
| Bradyrhizobium sp. ORS 278         | WP_011925649     |
| Oligotropha carboxidovorans OM5    | WP_012563812     |
| Bradyrhizobium oligotrophicum S58  | WP_015668065     |
| Bradyrhizobium elkanii             | WP_028167187     |
| Afipia clevelandensis ATCC 49720   | WP_002711116     |
| Bradyrhizobium sp. STM 3843        | WP_008966627     |
| Rhodopseudomonas palustris HaA2    | WP_011440614     |
| Bradyrhizobium sp. OHSU_III        | WP_024579432     |
| Afipia sp. P52-10                  | ETR74812         |
| Methylobacterium nodulans ORS 2060 | WP_015928577     |
| Bradyrhizobium sp. DFCI-1          | WP_021079929     |
| Bradyrhizobium sp. URHA0002        | WP_027538041     |
| Bradyrhizobium sp. STM 3809        | WP_008962867     |
| Bradyrhizobium elkanii             | WP_028331726     |
| Bradyrhizobium elkanii             | WP_018270579     |
| Bradyrhizobium elkanii             | WP_028350915     |
| Bradyrhizobium sp. ORS 285         | WP_006613850     |
| Bradyrhizobium elkanii             | WP_028338700     |
| Rhodopseudomonas palustris BisB5   | WP_011503969     |
| Methylobacterium sp. 10            | WP_027172964     |
| Rhodopseudomonas palustris TIE-1   | WP_012497138     |
| Methylobacterium sp. 88A           | WP_018044240     |
| Rhodopseudomonas palustris CGA009  | WP_011159286     |
| Nitrobacter winogradskyi Nb-255    | WP_011315497     |
| Bradyrhizobium sp. th.b2           | WP_029082145     |
| Bradyrhizobium sp. Cp5.3           | WP_027550404     |
| Bradyrhizobium japonicum           | WP_026312822     |
| Bradyrhizobium sp. URHD0069        | WP_029585636     |

| Query                                   | Accession Number |
|-----------------------------------------|------------------|
| Rhodopseudomonas palustris              | WP_027277923     |
| Rhodopseudomonas palustris DX-1         | P_013501367      |
| Bradyrhizobium japonicum                | WP_028157206     |
| Methylobacterium sp. GXF4               | WP_007566051     |
| Rhodopseudomonas palustris BisB18       | WP_011472175     |
| Methylobacterium sp. 77                 | WP_026597056     |
| Bradyrhizobium sp. URHA0013             | WP_027569005     |
| Methylobacterium sp. 285MFTsu5.1        | WP_020096225     |
| Bradyrhizobium japonicum                | WP_028169746     |
| Methylobacterium sp. 4-46               | WP_012330353     |
| Bradyrhizobium sp. Tv2a-2               | WP_024517353     |
| Bradyrhizobium sp. YR681                | WP_008144018     |
| Bradyrhizobium japonicum                | WP_028135319     |
| Bradyrhizobium sp. WSM2793              | WP_026201538     |
| Bradyrhizobium japonicum SEMIA 5079     | WP_014496829     |
| Methylobacterium sp. MB200              | WP_017484147     |
| Bradyrhizobium sp. CCGE-LA001           | EJZ31892         |
| Methylobacterium mesophilicum SR1.6/6   | WP_010686897     |
| Bradyrhizobium sp. WSM4349              | WP_026233266     |
| Bradyrhizobium sp. WSM1743              | WP_027572151     |
| Bradyrhizobium sp. WSM1417              | WP_027516850     |
| Bradyrhizobium sp. WSM1253              | WP_007593631     |
| Bradyrhizobium sp. S23321               | WP_015687471     |
| Bradyrhizobium japonicum                | WP_024339740     |
| Bradyrhizobium sp. WSM471               | WP_007608072     |
| Nitrobacter hamburgensis X14            | WP_011511134     |
| Methylobacterium populi BJ001           | WP_012456197     |
| Bradyrhizobium japonicum                | WP_028172333     |
| Methylobacterium radiotolerans JCM 2831 | WP_012320775     |
| Methylobacterium extorquens DSM 13060   | WP_003597531     |
| Bradyrhizobium japonicum                | WP_028143224     |



---

| Query                                    | Accession<br>Number |
|------------------------------------------|---------------------|
| Methylobacterium extorquens DM4          | WP_015824164        |
| Rhodopseudomonas palustris BisA53        | WP_011663239        |
| Bradyrhizobium japonicum                 | WP_028146946        |
| Bradyrhizobium diazoefficiens SEMIA 5080 | WP_011085779        |
| Bradyrhizobium sp. WSM3983               | WP_027533953        |

---

## 5. SUPPLEMENTAL REFERENCES

- Allen JF. (2003). Cyclic, pseudocyclic and noncyclic photophosphorylation: new links in the chain. *Trends Plant Sci* 8:15-19.
- Altschul SF, Madden TL, Schäffer AA, Zhang J, Zhang Z, Miller W, et al. (1997). Gapped BLAST and PSI-BLAST: a new generation of protein database search programs. *Nucl Acids Res* 25:3389-3402. (doi: 10.1093/nar/25.17.3389)
- Boyd ES, Jackson RA, Encarnacion G, Zahn JA, Beard T, Leavitt WD, et al. (2007) Isolation, characterization, and ecology of sulfur-respiring crenarchaea inhabiting acid-sulfate-chloride-containing geothermal springs in Yellowstone National Park. *Appl Env Microbiol* 73:6669-77. (doi: 10.1128/AEM.01321-07)
- Bradford MM. (1976). A rapid and sensitive method for the quantitation of microgram quantities of protein utilizing the principle of protein-dye binding. *Anal Biochem* 72:248–254.
- Cole JR, Chai B, Marsh TL, Farris RJ, Wang Q, Kulam SA, et al. (2003). The Ribosomal Database Project (RDP-II): previewing a new autoaligner that allows regular updates and the new prokaryotic taxonomy. *Nucleic Acids Res* 31:442–443.
- de Marsac ND, Houmard J. (1988). Complementary chromatic adaptation: Physiological conditions and action spectra. *Methods Enzymol* 167:318-328. (doi: 10.1016/0076-6879(88)67037-6)
- Edgar RC. (2004). MUSCLE: multiple sequence alignment with high accuracy and high throughput. *Nucl Acids Res* 19:1792–1797. (doi: 10.1093/nar/gkh340)
- Gregersen LH, Bryant DA, Frigaard N-U. (2011). Mechanisms and evolution of oxidative sulfur metabolism in Green Sulfur Bacteria. *Front Microbiol* 2:116. (doi: 10.3389/fmicb.2011.00116)
- Govindjee, Kern JF, Messinger J, Whitmarsh J, Govindjee, Kern JF. (2010). Photosystem II. In: Encyclopedia of Life Sciences (ELS). John Wiley & Sons, Ltd: Chichester, UK. (doi: 10.1002/9780470015902.a0000669.pub2)
- Guindon S, Dufayard JF, Lefort V, Anisimova M, Hordijk W, Gascuel O. (2010). New algorithms and methods to estimate maximum-likelihood phylogenies: Assessing the performance of PhyML 3.0. *Syst Biol* 59:307-421. (doi: 10.1093/sysbio/syq010)
- Gutekunst K, Chen X, Schreiber K, Kaspar U, Makam S, Appel J. (2014). The Bidirectional NiFe-hydrogenase in *Synechocystis* sp. PCC 6803 Is Reduced by Flavodoxin and Ferredoxin and Is Essential under Mixotrophic, Nitrate-limiting Conditions. *J Biol Chem* 289:1930-1937. (doi: 10.1074/jbc.M113.526376)
- Jablonsky J, Lazar D. (2008). Evidence for intermediate S-states as initial phase in the process of oxygen-evolving complex oxidation. *Biophys J* 94:2725-2736. (doi: 10.1529/biophysj.107.122861)
- Jegerschoeld C, Virgin I, Styring S. (1990). Light-dependent degradation of the D1 protein in photosystem II is accelerated after inhibition of the water splitting reaction. *Biochemistry* 29: 6179–6186. (doi: 10.1021/bi00478a010)
- Johnson MP. (2016). Photosynthesis. *Essays Biochem* 60:255–273. (doi: 10.1042/EBC20160016)

- Keren N, Berg A, van Kan PJ PJM, Levanon H, Ohad I. (1997). Mechanism of photosystem II photoinactivation and D1 protein degradation at low light: the role of back electron flow. *Proc Natl Acad Sci USA* 94:1579–84.
- Klatt JM, Al-Najjar MAA, Yilmaz P, Lavik G, de Beer D, Polerecky L. (2015a). Anoxygenic photosynthesis controls oxygenic photosynthesis in a cyanobacterium from a sulfidic spring. *Appl Environ Microbiol* 81:2025–2031. (doi:10.1128/AEM.03579-14).
- Klatt JM, Haas S, Yilmaz P, de Beer D, Polerecky L. (2015b). Hydrogen sulfide can inhibit and enhance oxygenic photosynthesis in a cyanobacterium from sulphidic springs. *Environ Microbiol* 17: 3301–3313. (doi:10.1111/1462-2920.12791)
- Kok B, Forbush B, McGloin M. (1970). Cooperation of charges in photosynthetic O<sub>2</sub> evolution-I. A linear four step mechanism. *Photochem Photobiol* 11:457–75.
- Lane DJ. (1991). 16S/23S rRNA sequencing. In: *Nucleic Acid Techniques in Bacterial Systematics* (eds. Stackebrandt E, Goodfellow, M), John Wiley and Sons, Chichester pp. 115–147.
- Lea-Smith DJ, Bombelli P, Vasudevan R, Howe CJ. (2016). Photosynthetic, respiratory and extracellular electron transport pathways in cyanobacteria. *Biochim Biophys Acta-Bioenerg* 1857:247–255. (doi:10.1016/j.bbabi.2015.10.007)
- Letunic I, Bork P. (2016). Interactive tree of life (iTOL) v3: an online tool for the display and annotation of phylogenetic and other trees. *Nucl Acids Res* 44:W242–W245. (doi: 10.1093/nar/gkw290)
- Messinger J and Renger G (2008) Photosynthetic water splitting. In: Renger G (ed). *Primary Processes of Photosynthesis: Basic Principles and Apparatus, Part II Reaction Centers/Photosystems, Electron Transport Chains, Photophosphorylation and Evolution*. Royal Society Chemistry: Cambridge, pp 291– 349.
- Mullineaux CW. (2014a). Co-existence of photosynthetic and respiratory activities in cyanobacterial thylakoid membranes. *Biochim Biophys Acta-Bioenerg* 1837:503–511. (doi: 10.1016/j.bbabi.2013.11.017)
- Mullineaux CW. (2014b). Electron transport and light-harvesting switches in cyanobacteria. *Front Plant Sci* 5:7. (doi: 10.3389/fpls.2014.00007)
- Murata N, Allakhverdiev SI, Nishiyama Y. (2012). The mechanism of photoinhibition in vivo: Re-evaluation of the roles of catalase,  $\alpha$ -tocopherol, non-photochemical quenching, and electron transport. *Biochim Biophys Acta-Bioenerg* 1817:1127–1133. (doi: 10.1016/j.bbabi.2012.02.020)
- Nagarajan A, Pakrasi HB, Nagarajan A, Pakrasi HB. (2015). Membrane-Bound Protein Complexes for Photosynthesis and Respiration in Cyanobacteria In: *Encyclopedia of Life Sciences (ELS)*. John Wiley & Sons, Ltd: Chichester, UK. (doi: 10.1002/9780470015902.A0001670.PUB2)
- Nishiyama Y, Allakhverdiev SI, Murata N. (2006). A new paradigm for the action of reactive oxygen species in the photoinhibition of photosystem II. *Biochim Biophys Acta-Bioenerg* 1757: 742–749. (doi: 10.1016/j.bbabi.2006.05.013)
- Peschek GA. (1999). Photosynthesis and Respiration of Cyanobacteria. In: *The Phototrophic Prokaryotes*. Springer US: Boston, MA, pp 201–209. (doi: 10.1007/978-1-4615-4827-0\_24)

- Rippka R, Denulles Y, Waterbury JB, Herdman M, Stanier RY. (1979). Generic assignment, strain histories and properties of pure cultures of cyanobacteria. *J Gen Microbiol* **111**: 1–61. (doi: 10.1099/00221287-111-1-1)
- Roach T, Krieger-Liszkay AK. (2014). Regulation of Photosynthetic Electron Transport and Photoinhibition. *Curr Protein Pept Sci* **15**: 351–362. (doi: 10.2174/1389203715666140327105143)
- Shevela D, Björn LO, Govindjee. (2013). Oxygenic photosynthesis. In: Razeghifard R (ed). *Natural and Artificial Photosynthesis*. John Wiley & Sons Inc.: Hoboken, NJ, USA, pp 13-64. (doi: 10.1002/9781118659892)
- Soetaert K, Petzoldt T, Setzer RW. (2010). Solving Differential Equations in R: Package deSolve. *J Stat Softw* **33**:1–25. (doi: 10.18637/jss.v033.i09)
- Vermaas WF. (2001). Photosynthesis and Respiration in Cyanobacteria. In: *Encyclopedia of Life Sciences (ELS)*. John Wiley & Sons, Ltd: Chichester, UK. (doi: 10.1038/npg.els.0001670)
- Whitmarsh J, Govindjee. (1999). The Photosynthetic Process. In: *Concepts in Photobiology*. Springer Netherlands: Dordrecht, pp 11–51.
- Zhang P, Eisenhut M, Brandt A-M, Carmel D, Silén HM, Vass I, et al. (2012). Operon flv4-flv2 Provides Cyanobacterial Photosystem II with Flexibility of Electron Transfer. *Plant Cell* **24**:1952-71. (doi: 10.1105/tpc.111.094417)
